# Supplementary material
Source: HighWire-hosted journal article supplement (https://www.cmajopen.ca/highwire/filestream/89989/field_highwire_adjunct_files/0/open-2021-0291-original-submission.pdf)
Supplement: open-2021-0291-original-submission.pdf [file open-2021-0291-original-submission.pdf]

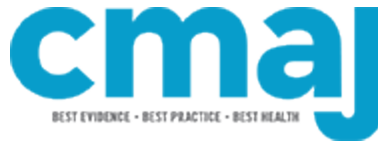

**Hot weather and mortality related to acute cocaine, opioid, and amphetamine toxicity in British Columbia, Canada: A time-stratified case-crossover study**

|                               |                                                                                                                                                                                                                                                                                                                                                                                                                                                                                                                                                                                                                                                                                                                                                                                                                                                                                                                                                                                                                                                                                                                                                                                                                                                                                                                                                                                                                             |
|-------------------------------|-----------------------------------------------------------------------------------------------------------------------------------------------------------------------------------------------------------------------------------------------------------------------------------------------------------------------------------------------------------------------------------------------------------------------------------------------------------------------------------------------------------------------------------------------------------------------------------------------------------------------------------------------------------------------------------------------------------------------------------------------------------------------------------------------------------------------------------------------------------------------------------------------------------------------------------------------------------------------------------------------------------------------------------------------------------------------------------------------------------------------------------------------------------------------------------------------------------------------------------------------------------------------------------------------------------------------------------------------------------------------------------------------------------------------------|
| Journal:                      | CMAJ                                                                                                                                                                                                                                                                                                                                                                                                                                                                                                                                                                                                                                                                                                                                                                                                                                                                                                                                                                                                                                                                                                                                                                                                                                                                                                                                                                                                                        |
| Manuscript ID                 | CMAJ-21-1880                                                                                                                                                                                                                                                                                                                                                                                                                                                                                                                                                                                                                                                                                                                                                                                                                                                                                                                                                                                                                                                                                                                                                                                                                                                                                                                                                                                                                |
| Manuscript Type:              | Research - Case control study                                                                                                                                                                                                                                                                                                                                                                                                                                                                                                                                                                                                                                                                                                                                                                                                                                                                                                                                                                                                                                                                                                                                                                                                                                                                                                                                                                                               |
| Date Submitted by the Author: | 05-Nov-2021                                                                                                                                                                                                                                                                                                                                                                                                                                                                                                                                                                                                                                                                                                                                                                                                                                                                                                                                                                                                                                                                                                                                                                                                                                                                                                                                                                                                                 |
| Complete List of Authors:     | Henderson, Sarah; BC Centre for Disease Control, Environmental Health Services<br>Ding, Joy; The University of British Columbia, School of Population and Public Health<br>Yao, Jiayun; BC Centre for Disease Control, Environmental Health Services<br>SahaTurna, Nikita; BC Centre for Disease Control, Environmental Health Services<br>McVea, David; BC Centre for Disease Control, Environmental Health Services<br>Kosatsky, Tom; BC Centre for Disease Control, Environmental Health Services                                                                                                                                                                                                                                                                                                                                                                                                                                                                                                                                                                                                                                                                                                                                                                                                                                                                                                                        |
| Keywords:                     | Drugs, Environment, Epidemiology, Public Health                                                                                                                                                                                                                                                                                                                                                                                                                                                                                                                                                                                                                                                                                                                                                                                                                                                                                                                                                                                                                                                                                                                                                                                                                                                                                                                                                                             |
| More Detailed Keywords:       | mortality, drug toxicity, hot weather, cocaine, amphetamines, opioids                                                                                                                                                                                                                                                                                                                                                                                                                                                                                                                                                                                                                                                                                                                                                                                                                                                                                                                                                                                                                                                                                                                                                                                                                                                                                                                                                       |
| Abstract:                     | <p>Background: Previous research has reported that cocaine-associated deaths occur more frequently in hot weather. This effect has not been described for other illicit drugs, or for combinations of drugs. The objective of this study was to evaluate the relationship between ambient temperature and risk of mortality related to cocaine, amphetamines, and opioids alone and in combination using vital statistics data from British Columbia, Canada.</p> <p>Methods: All deaths with cocaine, amphetamine or opioid toxicity recorded as an underlying or contributing cause were extracted from BC vital statistics data for 1998-2017. Cases were grouped by drug category and a time-stratified case-crossover design was used to estimate the effect of daily maximum temperature on risk of death associated with acute drug toxicity during the warmer months (May through September). Conditional logistic regression was used to estimate the odds ratio (OR) and the 95% confidence interval (CI) for daily maximum temperatures over the median, 75th and 90th percentiles of the regional distribution.</p> <p>Results: There were 3,058 deaths included in the analyses. The 90th percentile temperature was associated with an OR [CI] of 1.44 [1.02, 2.05] for deaths with only cocaine toxicity recorded. The effect was similar when both cocaine and opioid toxicity were present. The effect</p> |

1  
2  
3  
4  
5  
6  
7  
8  
9  
10  
11  
12  
13  
14  
15  
16  
17  
18  
19  
20  
21  
22  
23  
24  
25  
26  
27  
28  
29  
30  
31  
32  
33  
34  
35  
36  
37  
38  
39  
40  
41  
42  
43  
44  
45  
46  
47  
48  
49  
50  
51  
52  
53  
54  
55  
56  
57  
58  
59  
60

|  |                                                                                                                                                                                                                                                                                                                                                                                                                                                                                                                      |
|--|----------------------------------------------------------------------------------------------------------------------------------------------------------------------------------------------------------------------------------------------------------------------------------------------------------------------------------------------------------------------------------------------------------------------------------------------------------------------------------------------------------------------|
|  | <p>was most pronounced for cases in which toxicity due to all three drugs was evident, with an OR of 3.11 [1.39, 6.95] for the 90th percentile temperature.</p> <p>Interpretation: Hot weather was associated with higher odds of mortality related to cocaine toxicity, and this was most pronounced when amphetamine and opioid toxicity were also present. Targeted interventions are necessary to prevent death associated with cocaine use during hot weather, especially for users of multiple substances.</p> |
|  |                                                                                                                                                                                                                                                                                                                                                                                                                                                                                                                      |

SCHOLARONE™  
Manuscripts

1  
2  
3  
4 1 **Hot weather and mortality related to acute cocaine,**  
5  
6  
7 2 **opioid, and amphetamine toxicity in British Columbia,**  
8  
9 3 **Canada: A time-stratified case-crossover study**  
10  
11  
12  
13 4

14 5 Sarah B. Henderson, PhD<sup>1,2\*</sup>

16 6 Yue Ding, MHSc<sup>2</sup>

17 7 Jiayun Yao, PhD<sup>1</sup>

18 8 Nikita SahaTurna, PhD<sup>1</sup>

19 9 David McVea, MD, MPH, PhD<sup>1,2</sup>

20 10 Tom Kosatsky, MD, MPH<sup>1,2</sup>

21 11  
22 12 1. Environmental Health Services, BC Centre for Disease Control, Vancouver, Canada

23 13 2. School of Population and Public Health, The University of British Columbia

24 14 \*Corresponding author: [sarah.henderson@bccdc.ca](mailto:sarah.henderson@bccdc.ca); 604-707-2449

25 15  
26 16 **Keywords:** mortality; drug toxicity; overdose; hot weather; cocaine; amphetamines; opioids

27 17 **Funding:** N/A

28 18 **Competing interests:** None

29 19

30 20

31 21

32 22

## 23 **Abstract**

24 **Background:** Previous research has reported that cocaine-associated deaths occur more  
25 frequently in hot weather. This effect has not been described for other illicit drugs, or for  
26 combinations of drugs. The objective of this study was to evaluate the relationship between  
27 ambient temperature and risk of mortality related to cocaine, amphetamines, and opioids alone  
28 and in combination using vital statistics data from British Columbia, Canada.

29 **Methods:** All deaths with cocaine, amphetamine or opioid toxicity recorded as an underlying or  
30 contributing cause were extracted from BC vital statistics data for 1998-2017. Cases were  
31 grouped by drug category and a time-stratified case-crossover design was used to estimate the  
32 effect of daily maximum temperature on risk of death associated with acute drug toxicity during  
33 the warmer months (May through September). Conditional logistic regression was used to  
34 estimate the odds ratio (OR) and the 95% confidence interval (CI) for daily maximum  
35 temperatures over the median, 75<sup>th</sup> and 90<sup>th</sup> percentiles of the regional distribution.

36 **Results:** There were 3,058 deaths included in the analyses. The 90<sup>th</sup> percentile temperature was  
37 associated with an OR [CI] of 1.44 [1.02, 2.05] for deaths with only cocaine toxicity recorded.  
38 The effect was similar when both cocaine and opioid toxicity were present. The effect was most  
39 pronounced for cases in which toxicity due to all three drugs was evident, with an OR of 3.11  
40 [1.39, 6.95] for the 90<sup>th</sup> percentile temperature.

41 **Interpretation:** Hot weather was associated with higher odds of mortality related to cocaine  
42 toxicity, and this was most pronounced when amphetamine and opioid toxicity were also present.  
43 Targeted interventions are necessary to prevent death associated with cocaine use during hot  
44 weather, especially for users of multiple substances.

## 45 **Introduction**

46 Psychoactive substances act on the brain to change mood, perception, and behaviour, but differ  
47 in their mode of action and effects on the body. Some of these effects and their accompanying  
48 health risks can be exacerbated by environmental conditions. Both cocaine and amphetamines  
49 are psychostimulants that can increase levels of dopamine in the brain (1). Cocaine use increases  
50 the risk of many life-threatening health outcomes, including convulsions, kidney failure,  
51 cardiovascular emergencies, and brain hemorrhage (2) and is one of the leading causes of drug-  
52 related deaths in North America (3). Cocaine also causes a hypermetabolic state that increases  
53 body temperature, and its associated health risks are higher during hot weather (2). Opioids act  
54 on nerve cells, induce analgesia and euphoria via effects on the peripheral and central nervous  
55 systems, respectively (4). Opioids include legally prescribed analgesics such as codeine,  
56 oxycodone, hydrocodone, morphine, hydromorphone, and fentanyl, as well as illicit drugs such  
57 as heroin. There has been an ongoing crisis worldwide due to entry of the synthetic opioids  
58 fentanyl and carfentanyl into the illicit drug supply (5).

59 Two ecologic studies in New York, USA and one individual-level study in Quebec, Canada have  
60 reported that cocaine-associated mortalities occur more frequently in hot weather (6–8). Broadly,  
61 three underlying mechanisms may explain this observation: (I) increased heat production due to  
62 agitation and delirium and associated muscular activity; (II) reduced heat dissipation due to  
63 central inhibition of sympathetic outflow to cutaneous vasodilatory and sudomotor targets; and  
64 (III) reduced sense of discomfort in the face of heat stress which inhibits heat avoidance  
65 behaviours (2,9–12). While the risk of opioid use is higher during cold weather, increased risk  
66 has not been shown during hot weather (6,7,13). The effects of hot weather on the risk of death  
67 due to amphetamines have not been examined to date. The objective of this study was to evaluate

1  
2  
3 68 the relationship between hot weather and mortality associated with cocaine, amphetamine, and  
4  
5 69 opioid toxicity when present in the vital statistics death record, either alone or in combination,  
6  
7  
8 70 using a time-stratified case-crossover design.  
9

## 11 71 **Methods**

### 13 72 **Study area and period**

14 73 British Columbia (BC) is the westernmost province in Canada, with a landmass covering  
15  
16 74 944,735 km<sup>2</sup> and spanning 25 degrees of longitude and 11 degrees of latitude. The current  
17  
18 75 population is approximately 5.0 million people, most of whom live in the temperate  
19  
20  
21 76 southwestern region where the average daytime high is 22°C during the summer months.  
22  
23 77 Temperatures are higher in the arid interior region, located between the Coast Mountain and  
24  
25 78 Rocky Mountain ranges, and lower in the sparsely populated northwestern region. The study  
26  
27  
28 79 examines the relationship between overdose mortality and hot weather during the warmer  
29  
30 80 months (May-September) of the 20-year period from 1998-2017.  
31  
32  
33  
34

### 35 81 **Outcome: death associated with illicit drug toxicity**

36 82 Vital statistics data on all deaths in BC are made available to the BC Centre for Disease Control  
37  
38 83 (BCCDC) for environmental health surveillance and assessment. The death records include date  
39  
40  
41 84 of death, underlying and contributing causes of death, age, sex, and residential 6-digit postal  
42  
43  
44 85 code. Deaths associated with cocaine, amphetamines, or opioids were identified based on the 10<sup>th</sup>  
45  
46  
47 86 revision of the International Classification of Diseases (ICD-10).  
48  
49

50 87 Deaths attributed to specific drugs can have an ICD-10 code starting with T (acute toxicity) or F  
51  
52 88 (chronic use). While coding practices differ across agencies, BC Vital Statistics uses the US  
53  
54  
55 89 National Vital Statistic System guidelines (14) and will only use a T code when a coroner  
56  
57  
58  
59  
60

1  
2  
3 90 specifies known overdose, poisoning, or toxicity due to a specific drug. All deaths from May-  
4  
5 91 September 1998-2017 with any T code for cocaine, opioid, or amphetamine toxicity as a primary  
6  
7 92 or secondary cause were included in the analyses. Many of these deaths also had an F code for  
8  
9 93 chronic drug use as an underlying or contributing cause (Table 1). As a comparator, deaths with  
10  
11 94 only an F code for chronic cocaine, opioid, or amphetamine use were also examined. Deaths  
12  
13 95 without a T code and with F codes for more than one of the three drugs were excluded from the  
14  
15 96 comparative analyses.

### 19 20 97 **Exposure: daily maximum temperature**

21  
22 98 The complex topography of BC creates many microclimates, and there are clear differences in  
23  
24 99 heat-related health risks across the province (15,16). Our previous work has identified 32 zones  
25  
26 100 for use in the BC Heat Impacts Prediction System (BCHIPS), which forecasts health risks  
27  
28 101 associated with high temperatures during the summer months (<https://maps.bccdc.ca/bchips/>).  
29  
30 102 The death records were linked with temperature information for one of the 32 zones based on the  
31  
32 103 residential 6-digit postal code of the decedent. In addition, we extracted all daily maximum  
33  
34 104 temperature observations for the 32 zones from May-September for the study period. These data  
35  
36 105 were used to characterize the typical warm weather median, 75<sup>th</sup> percentile, and 90<sup>th</sup> percentile  
37  
38 106 temperatures for each zone (Figure 1).

### 39 40 41 107 **Study design**

42  
43  
44 108 A time-stratified case-crossover design was used to describe the effect of temperature on deaths  
45  
46 109 associated with cocaine, opioid, and amphetamine toxicity. The case-crossover design was  
47  
48 110 developed to study the immediate determinants of acute onset disease (e.g., myocardial  
49  
50 111 infarction) and to avoid selection and information bias (17). This method had been widely  
51  
52 112 applied in diseases and mortality risks related to air pollution (18–21), temperature (22–25), and  
53  
54  
55  
56  
57  
58  
59  
60

1  
2  
3 113 adverse drug events (26,27). The case-crossover design is suited for acute outcomes caused by  
4  
5 114 transient exposures and can avoid confounding effects of factors that do not vary over the short-  
6  
7  
8 115 term, such as sex, age, social-economic status, lifestyle, underlying comorbidities, and  
9  
10 116 seasonality (17). It also allows for examination of effect modification by stratification.

11  
12  
13 117 To evaluate the association between the outcome and the exposure, the maximum temperature on  
14  
15 118 the day of death (event date) was compared with the maximum temperatures for similar dates on  
16  
17 119 which the death did not occur (control dates). The control dates were selected with the time-  
18  
19  
20 120 stratified bidirectional referent approach, meaning that they were matched by day-of-week and  
21  
22 121 calendar month to the death date for each individual. All temperatures were categorized to  
23  
24 122 indicate whether they were greater than the median, 75<sup>th</sup> percentile, and 90<sup>th</sup> percentile  
25  
26 123 temperatures for the microclimatic zone (Figure 1).

### 30 124 **Statistical analysis**

31  
32  
33 125 All deaths with cocaine, opioid, and amphetamine toxicity (T codes) were stratified into one of  
34  
35 126 seven groups based on the ICD-10 codes present in the vital statistics record: (I) cocaine only; (II)  
36  
37 127 opioid only; (III) amphetamine only; (IV) cocaine + opioid; (V) cocaine + amphetamine; (VI)  
38  
39 128 opioid + amphetamine; and (VII) all three drugs. Conditional logistic regression was used to  
40  
41  
42 129 estimate the odds ratios (OR) and 95% confidence intervals (95% CI) for the association between  
43  
44 130 temperature category (over the median, 75<sup>th</sup>, and 90<sup>th</sup> percentile for the zone) and mortality  
45  
46 131 among these groups. Subgroup analyses were also conducted by sex and by residence within or  
47  
48 132 outside of the greater Vancouver metropolitan area. Finally, analyses were repeated for deaths  
49  
50 133 that had one chronic drug use (F code) but no acute toxicity (T code) present in the vital statistics  
51  
52  
53 134 record. This was to better evaluate whether effects were associated with drug use in general, or  
54  
55  
56  
57  
58  
59  
60



1  
2  
3 135 with acute toxicity. The R statistical computing environment version 3.5.1 was used for all data  
4  
5 136 management, analysis, and visualization (28).  
6  
7

## 8 9 137 **Results**

### 10 11 138 **Study subjects**

12  
13 139 During the May-September months of 1998-2017 there were 3058 deaths with acute cocaine,  
14  
15 140 opioid, or amphetamine toxicity (T code) present in the vital statistics record. Of these, 488  
16  
17 141 (16.0 %) had cocaine only, 1426 (46.6%) had opioids only, 111 (3.2%) had amphetamines only,  
18  
19 142 and 1033 (33.8%) had more than one of the three drugs. The mean age at death was  
20  
21 143 approximately 41 years, 72.7% of decedents were male, and 53.9% lived in greater Vancouver,  
22  
23 144 where approximately half of the provincial population resides (Table 2). During the same period  
24  
25 145 there were 553 deaths that only had chronic cocaine use (F code) present in the vital statistics  
26  
27 146 record; they did not have codes for chronic opioid or amphetamine use, nor for acute toxicity  
28  
29 147 from any of the three drugs. There were 235 deaths that only had chronic opioid use and 82 that  
30  
31 148 only had chronic amphetamine use.  
32  
33  
34  
35  
36  
37

### 38 149 **Primary analysis**

39  
40 150 In the regression models, odds of mortality generally increased with increasing temperature for  
41  
42 151 all seven categories of drug combinations (Figure 2). However, the odds ratios (ORs) and 95%  
43  
44 152 confidence intervals (CIs) were only significantly increased when acute cocaine toxicity was  
45  
46 153 present, either alone or in combination with other drugs. When cocaine toxicity was present  
47  
48 154 alone (N=488), temperatures over the regional median, 75<sup>th</sup>, and 90<sup>th</sup> percentiles were all  
49  
50 155 associated with increased risk and OR [CI] values ranged from 1.33 [1.05, 1.68] for the median  
51  
52 156 to 1.44 [1.02, 2.05] for the 90<sup>th</sup> percentile. When cocaine was present with opioids (N=754) the  
53  
54  
55  
56  
57  
58  
59  
60

1  
2  
3 157 ORs were smaller for the median and 75<sup>th</sup> percentile temperatures, but similar for the 90<sup>th</sup>  
4  
5 158 percentile at 1.40 [1.07, 1.84]. The combination of cocaine and amphetamines is more difficult to  
6  
7  
8 159 interpret, due to very small numbers (N=37). When all three of cocaine, opioids, and  
9  
10 160 amphetamines were present (N=103), risk was clearly elevated for all thresholds, ranging from  
11  
12 161 1.65 [1.00, 2.72] for the median to 3.11 [1.39, 6.95] for the 90<sup>th</sup> percentile (Figure 2).  
13  
14

## 15 162 **Secondary analyses**

16 163 When the same models were applied for death records with chronic (F code) drug use but not  
17  
18 164 acute toxicity (T code), the odds ratios generally decreased for increasing temperatures (Figure  
19  
20 165 3). Deaths with chronic use of cocaine were the exception, though the ORs were smaller than  
21  
22  
23 166 those for acute cocaine toxicity and they were not statistically significant. Subset analyses by sex  
24  
25 167 and residential location were restricted to models for temperatures over the zonal 90<sup>th</sup> percentile.  
26  
27 168 These showed that females were at higher risk than males, even though most deaths occurred  
28  
29 169 among males (Figure 4). For deaths with acute cocaine toxicity alone, the OR [CI] was 2.36  
30  
31  
32 170 [1.17, 4.75] for females (N=107) compared with 1.24 [0.83, 1.86] for males (N=381) suggesting  
33  
34 171 that the female group drove the overall OR of 1.44 [1.02, 2.05]. For deaths with acute opioid  
35  
36  
37 172 toxicity alone, the OR [CI] was 1.52 [1.08, 2.13] for females (N=436) compared with 0.98 [0.76,  
38  
39 173 1.25] for males (N=990), where the overall OR of 1.13 [0.93, 1.38] indicated no significant risk.  
40  
41 174 There were no clear differences by residential location, even though greater Vancouver is  
42  
43  
44 175 generally cooler than other parts of BC (Figure 1).  
45  
46  
47

## 48 176 **Interpretation**

49  
50  
51 177 Overall, there was clear evidence that odds of cocaine-related mortality were higher on hot days,  
52  
53  
54 178 and that the combination of cocaine, amphetamines and opioids was particularly risky.  
55  
56  
57  
58  
59  
60

1  
2  
3 179 Temperatures over the zonal 90<sup>th</sup> percentile were associated with a 44% [2%, 105%] increase in  
4  
5 180 odds of mortality when acute cocaine toxicity was present. The effect of higher temperatures was  
6  
7 181 most pronounced for deaths where toxicity associated with all three drugs was present.  
8  
9

10  
11 182 Our findings are consistent with the small body of epidemiologic evidence on this topic (6–8).

12  
13 183 Auger et al. (2017) studied 762 cases of death involving cocaine during the summer months of

14  
15 184 2000-2013 in Quebec, Canada using a similar case-crossover design. They reported that a

16  
17 185 maximum temperature of 30°C was associated with an OR of 1.53 [1.03, 2.27] for death

18  
19 186 involving cocaine toxicity (T codes), compared with a maximum temperature of 20°C (6).

20  
21 187 Marzuk et al. (1998) studied 2,886 cases involving unintentional drug overdose from 1990 to

22  
23 188 1995, in New York, USA. They compared three mutually exclusive case groups (cocaine,

24  
25 189 opioids, and other drugs) with two other groups (homicides and deaths from motor vehicle

26  
27 190 crashes). Mortality involving cocaine was 33% higher than on hotter days than on cooler days,

28  
29 191 where the threshold value was 31.1°C (7). Bohnert et al. (2010) reported a similar conclusion in

30  
31 192 their study from 1990 to 2006 in New York, USA, but with a substantially lower temperature

32  
33 193 threshold of 24°C (8).  
34  
35  
36  
37  
38  
39

40 194 Several mechanisms are potentially related to the higher risk of mortality for cocaine users in hot

41  
42 195 weather. Previous studies have reported hyperthermia caused by cocaine, mediated by increased

43  
44 196 heat production, and reduced heat dissipation. The conventional view suggests that hyperthermia

45  
46 197 in cocaine users can be predominantly attributed to a hypermetabolic state, where heat

47  
48 198 production increases dramatically by agitation and increased muscular activity (29). This is

49  
50 199 supported by the work of Ansah et al. (1996), who observed a significant increase in locomotor

51  
52 200 activity in rats when cocaine was repeatedly injected (9). Crandall et al. (2002) conducted a

53  
54 201 double-blind trial to study the effects of cocaine on human body temperature regulation, and  
55  
56  
57  
58  
59  
60

1  
2  
3 202 found delayed onset of thermoregulatory responses (e.g., cutaneous vasodilation and sweating)  
4  
5 203 and attenuated feelings of discomfort. They concluded that the hyperthermic effect of low dose  
6  
7 204 cocaine was mainly related to impaired temperature dissipation rather than augmented heat  
8  
9  
10 205 production (2).

11  
12  
13 206 We observed that concurrent exposure to both amphetamines and cocaine had an additive effect  
14  
15 207 on odds of mortality in hot weather. One possible explanation is that both drug classes lead to  
16  
17 208 heat generation and reduced heat dissipation through different mechanisms, including (I)  
18  
19 209 inhibition of neuronal receptors resulting in elevated synaptic dopamine levels (30–32), and (II)  
20  
21 210 increased brain serotonin levels leading to increased body temperature (33,34). There is also  
22  
23 211 evidence that “speedball” (taking stimulants and opioids in combination at low doses)  
24  
25 212 synergistically enhances locomotor activity and hyperactivity. Studies in humans have found that  
26  
27 213 stimulant-opioid combinations produce cardiovascular and subjective effects that differ from the  
28  
29 214 effects produced by either drug alone (35–37).

30  
31  
32  
33  
34  
35 215 Our finding of increased risk of cocaine death on hot days in females is consistent with sex-  
36  
37 216 linked differences in the effects of cocaine in rats. Several *in vivo* studies have shown that  
38  
39 217 intrinsic sex differences in drug metabolism result in variation in the levels of active drug  
40  
41 218 metabolites between males and females (38–40). In response to cocaine, female rats were found  
42  
43 219 to have increased striatal dopamine levels (41) and serum adrenocorticotrophic hormone secretion  
44  
45 220 (42) compared with male rats. Several rodent studies have also shown higher rotational  
46  
47 221 sensitivity and locomotor activity in intact female rats than in male and ovariectomized female  
48  
49 222 rats (43–45). Together, these studies suggest an interaction between ovarian hormones and  
50  
51 223 cocaine metabolism and cocaine-induced effects.  
52  
53  
54  
55  
56  
57  
58  
59  
60

1  
2  
3 224 Our study has some important limitations. Although there are many potential mechanisms that  
4  
5 225 could explain our observations, we cannot discount the possibility that our findings are  
6  
7 226 confounded by heat and cocaine-associated behaviours. It is possible that cocaine use is more  
8  
9  
10 227 likely to occur on warmer rather than cooler days, or that cocaine users are more likely to engage  
11  
12 228 in risky behaviour on hotter days. Both alternative hypotheses could explain, at least in part, the  
13  
14 229 observed association. Individuals were matched to temperatures based on their residential 6-digit  
15  
16  
17 230 postal code in the vital statistics record, but they may not have been exposed at these locations on  
18  
19 231 the date of death or the control dates. Finally, the vital statistics records do not include any  
20  
21 232 information on the toxic dose of drugs present at the time of death, meaning that we cannot  
22  
23 233 evaluate the degree of intoxication, only the fact of intoxication. All these limitations are shared  
24  
25  
26 234 by similar studies on the topic (6–8).

27  
28  
29 235 This study found that hotter temperatures were associated with a higher risk of mortality when  
30  
31 236 the code for acute cocaine toxicity was present in the vital statistics record. The effect was more  
32  
33 237 pronounced when cocaine was combined with both opioids and amphetamines, and risk was  
34  
35  
36 238 higher in females than males. The mechanism is likely related to the hyperthermia effects caused  
37  
38 239 by cocaine, which had been demonstrated in human and animal studies. Further research is  
39  
40  
41 240 necessary to investigate the interaction between cocaine, opioids, and amphetamines, and to  
42  
43 241 evaluate whether this interaction can be observed consistently in other settings. Targeted  
44  
45 242 interventions are necessary to prevent death from drug toxicity during hot weather, especially for  
46  
47  
48 243 people who use multiple psychoactive substances.

## References

1. Callahan PM, Appel JB, Cunningham KA. Dopamine D1 and D2 mediation of the discriminative stimulus properties of d-amphetamine and cocaine. *Psychopharmacology*. 1991 Jan 1;103(1):50–5.
2. Crandall CG, Vongpatanasin W, Victor RG. Mechanism of Cocaine-Induced Hyperthermia in Humans. *Ann Intern Med*. 2002 Jun 4;136(11):785–91.
3. Kariisa M, Scholl L, Wilson N, Seth P, Hoots B. Drug Overdose Deaths Involving Cocaine and Psychostimulants with Abuse Potential — United States, 2003–2017. *MMWR Morb Mortal Wkly Rep*. 2019 May 3;68(17):388–95.
4. Djurendic-Brenesel M, Pilija V. Chapter 86 - Opiate Receptors and Gender and Relevance to Heroin Addiction. In: Preedy VR, editor. *Neuropathology of Drug Addictions and Substance Misuse* [Internet]. San Diego: Academic Press; 2016 [cited 2021 Nov 3]. p. 922–32. Available from: <https://www.sciencedirect.com/science/article/pii/B9780128002131000869>
5. Armenian P, Vo KT, Barr-Walker J, Lynch KL. Fentanyl, fentanyl analogs and novel synthetic opioids: A comprehensive review. *Neuropharmacology*. 2018 May 15;134:121–32.
6. Auger N, Bilodeau-Bertrand M, Labesse ME, Kosatsky T. Association of elevated ambient temperature with death from cocaine overdose. *Drug and Alcohol Dependence*. 2017 Sep 1;178:101–5.
7. Marzuk PM, Tardiff K, Leon AC, Hirsch CS, Portera L, Iqbal MI, et al. Ambient Temperature and Mortality From Unintentional Cocaine Overdose. *JAMA*. 1998 Jun 10;279(22):1795–800.
8. Bohnert ASB, Prescott MR, Vlahov D, Tardiff KJ, Galea S. Ambient temperature and risk of death from accidental drug overdose in New York City, 1990–2006. *Addiction*. 2010;105(6):1049–54.

- 1  
2  
3  
4 9. Ansah T-A, Wade LH, Shockley DC. Changes in Locomotor Activity, Core Temperature,  
5 and Heart Rate in Response to Repeated Cocaine Administration. *Physiology & Behavior*.  
6 1996 Nov 1;60(5):1261–7.  
7  
8
- 9  
10 10. Ruttenber AJ, Lawler-Heavner J, Yin M, Wetli CV, Hearn WL, Mash DC. Fatal Excited  
11 Delirium Following Cocaine Use: Epidemiologic Findings Provide New Evidence for  
12 Mechanisms of Cocaine Toxicity. *JFS*. 1997 Jan 1;42(1):25–31.  
13  
14
- 15 11. Menaker J, Farcy DA, Boswell SA, Stein DM, Dutton RP, Hess JR, et al. Cocaine-Induced  
16 Agitated Delirium with Associated Hyperthermia: A Case Report. *The Journal of*  
17 *Emergency Medicine*. 2011 Sep 1;41(3):e49–53.  
18  
19
- 20 12. Plush T, Shakespeare W, Jacobs D, Ladi L, Sethi S, Gasperino J. Cocaine-Induced Agitated  
21 Delirium: A Case Report and Review. *J Intensive Care Med*. 2015 Jan 1;30(1):49–57.  
22  
23
- 24 13. Goedel WC, Marshall BDL, Spangler KR, Alexander-Scott N, Green TC, Wellenius GA, et  
25 al. Increased Risk of Opioid Overdose Death Following Cold Weather: A Case–Crossover  
26 Study. *Epidemiology*. 2019 Sep;30(5):637–41.  
27  
28
- 29 14. ICD-10-Mortality Manual 2a - 2016 [Internet]. US National Vital Statistic System;  
30 Available from: [https://www.cdc.gov/nchs/data/dvs/2a\\_2016.pdf](https://www.cdc.gov/nchs/data/dvs/2a_2016.pdf)  
31  
32
- 33 15. Henderson SB, Wan V, Kosatsky T. Differences in heat-related mortality across four  
34 ecological regions with diverse urban, rural, and remote populations in British Columbia,  
35 Canada. *Health & Place*. 2013 Sep 1;23:48–53.  
36  
37
- 38 16. McLean KE, Stranberg R, MacDonald M, Richardson GRA, Kosatsky T, Henderson SB.  
39 Establishing Heat Alert Thresholds for the Varied Climatic Regions of British Columbia,  
40 Canada. *International Journal of Environmental Research and Public Health*. 2018  
41 Sep;15(9):2048.  
42  
43
- 44 17. Maclure M. The Case-Crossover Design: A Method for Studying Transient Effects on the  
45 Risk of Acute Events. *American Journal of Epidemiology*. 1991 Jan 15;133(2):144–53.  
46  
47  
48  
49  
50  
51  
52  
53  
54  
55  
56  
57  
58  
59  
60

18. Bateson TF, Schwartz J. Who Is Sensitive to the Effects of Particulate Air Pollution on Mortality? A Case-Crossover Analysis of Effect Modifiers. *Epidemiology*. 2004;15(2):143–9.
19. Janes H, Sheppard L, Lumley T. Case-Crossover Analyses of Air Pollution Exposure Data: Referent Selection Strategies and Their Implications for Bias. *Epidemiology*. 2005;16(6):717–26.
20. Carracedo-Martínez Eduardo, Taracido Margarita, Tobias Aurelio, Saez Marc, Figueiras Adolfo. Case-Crossover Analysis of Air Pollution Health Effects: A Systematic Review of Methodology and Application. *Environmental Health Perspectives*. 2010 Aug 1;118(8):1173–82.
21. Casas L, Cox B, Bauwelinck M, Nemery B, Deboosere P, Nawrot TS. Does air pollution trigger suicide? A case-crossover analysis of suicide deaths over the life span. *Eur J Epidemiol*. 2017 Nov 1;32(11):973–81.
22. Kyobutungi C, Grau A, Stieglbauer G, Becher H. Absolute temperature, temperature changes and stroke risk: a case-crossover study. *Eur J Epidemiol*. 2005;20(8):693–8.
23. Polcaro-Pichet S, Kosatsky T, Potter BJ, Bilodeau-Bertrand M, Auger N. Effects of cold temperature and snowfall on stroke mortality: A case-crossover analysis. *Environment International*. 2019 May 1;126:89–95.
24. Guo Yuming, Barnett Adrian G, Pan Xiaochuan, Yu Weiwei, Tong Shilu. The Impact of Temperature on Mortality in Tianjin, China: A Case-Crossover Design with a Distributed Lag Nonlinear Model. *Environmental Health Perspectives*. 2011 Dec 1;119(12):1719–25.
25. Bell ML, O’Neill MS, Ranjit N, Borja-Aburto VH, Cifuentes LA, Gouveia NC. Vulnerability to heat-related mortality in Latin America: a case-crossover study in São Paulo, Brazil, Santiago, Chile and Mexico City, Mexico. *Int J Epidemiol*. 2008 Aug;37(4):796–804.



- 1
- 2
- 3
- 4 26. Viboud C, Boëlle PY, Kelly J, Auquier A, Schlingmann J, Roujeau JC, et al. Comparison of
- 5 the statistical efficiency of case–crossover and case–control designs: Application to severe
- 6 cutaneous adverse reactions. *Journal of Clinical Epidemiology*. 2001 Dec 1;54(12):1218–27.
- 7
- 8
- 9
- 10 27. Sturkenboom MCJM, Middelbeek A, De Jong Van Den Berg LTW, Van Den Berg PB,
- 11 Stricker BHCh, Wesseling H. Vulvo-vaginal candidiasis associated with acitretin. *Journal*
- 12 *of Clinical Epidemiology*. 1995 Aug 1;48(8):991–7.
- 13
- 14
- 15
- 16 28. R Core Team. R: A language and Renvironment for statistical computing [Internet]. Vienna,
- 17 Austria: R Foundation for Statistical Computing; 2020. Available from: [https://www.R-](https://www.R-project.org)
- 18 [project.org](https://www.R-project.org)
- 19
- 20
- 21
- 22 29. Brown PL, Kiyatkin EA. Brain temperature change and movement activation induced by
- 23 intravenous cocaine delivered at various injection speeds in rats. *Psychopharmacology*.
- 24 2005 Sep 1;181(2):299–308.
- 25
- 26
- 27
- 28 30. Kahlig KM, Galli A. Regulation of dopamine transporter function and plasma membrane
- 29 expression by dopamine, amphetamine, and cocaine. *European Journal of Pharmacology*.
- 30 2003 Oct 31;479(1):153–8.
- 31
- 32
- 33
- 34 31. Fleckenstein AE, Volz TJ, Riddle EL, Gibb JW, Hanson GR. New Insights into the
- 35 Mechanism of Action of Amphetamines. *Annual Review of Pharmacology and Toxicology*.
- 36 2007;47(1):681–98.
- 37
- 38
- 39
- 40 32. Calipari ES, Ferris MJ. Amphetamine Mechanisms and Actions at the Dopamine Terminal
- 41 Revisited | *Journal of Neuroscience*. *Journal of Neuroscience*. 2013;33(21):8923–5.
- 42
- 43
- 44 33. Silins E, Copeland J, Dillon P. Qualitative Review of Serotonin Syndrome, Ecstasy
- 45 (MDMA) and the use of Other Serotonergic Substances: Hierarchy of Risk.
- 46 2007;41(8):649–55.
- 47
- 48
- 49
- 50 34. Sharma HS, Muresanu D, Sharma A, Patnaik R. Chapter 11 - Cocaine-Induced Breakdown
- 51 of the Blood–Brain Barrier and Neurotoxicity. In: *International Review of Neurobiology*
- 52 [Internet]. Academic Press; 2009 [cited 2021 Oct 18]. p. 297–334. (New Concepts of
- 53
- 54
- 55
- 56
- 57
- 58
- 59
- 60

Psychostimulant Induced Neurotoxicity; vol. 88). Available from:

<https://www.sciencedirect.com/science/article/pii/S0074774209880112>

35. Foltin RW, Fischman MW. The cardiovascular and subjective effects of intravenous cocaine and morphine combinations in humans. *J Pharmacol Exp Ther*. 1992 May 1;261(2):623–32.
36. Preston KL, Preston KL, Strain EC, Bigelow GE, Sullivan JT, Preston KL. Enhancement of cocaine's abuse liability in methadone maintenance patients. *Psychopharmacology*. 1996 Jan 1;123(1):15–25.
37. Walsh SL, Sullivan JT, Preston KL, Garner JE, Bigelow GE. Effects of naltrexone on response to intravenous cocaine, hydromorphone and their combination in humans. *Journal of Pharmacology and Experimental Therapeutics*. 1996;524–38.
38. Zhang J, Dean RA, Brzezinski MR, Bosron WF. Gender-specific differences in activity and protein levels of cocaine carboxylesterase in rat tissues. *Life Sciences*. 1996 Aug 30;59(14):1175–84.
39. Bowman BP, Vaughan SR, Walker QD, Davis SL, Little PJ, Scheffler NM, et al. Effects of Sex and Gonadectomy on Cocaine Metabolism in the Rat. *J Pharmacol Exp Ther*. 1999 Sep 1;290(3):1316–23.
40. Festa ED, Russo SJ, Gazi FM, Niyomchai T, Kemen LM, Lin S-N, et al. Sex differences in cocaine-induced behavioral responses, pharmacokinetics, and monoamine levels. *Neuropharmacology*. 2004 Apr 1;46(5):672–87.
41. Walker QD, Ray R, Kuhn CM. Sex Differences in Neurochemical Effects of Dopaminergic Drugs in Rat Striatum. *Neuropsychopharmacol*. 2006 Jun;31(6):1193–202.
42. Kuhn C, Francis R. Gender Difference in Cocaine-Induced HPA Axis Activation. *Neuropsychopharmacol*. 1997 Jun;16(6):399–407.

- 1  
2  
3  
4 43. Morishima HO, Abe Y, Matsuo M, Akiba K, Masaoka T, Cooper TB. Gender-related  
5 differences in cocaine toxicity in the rat. *The Journal of Laboratory and Clinical Medicine*.  
6 1993 Aug 1;122(2):157–63.  
7  
8  
9  
10 44. Sell SL, Scalzitti JM, Thomas ML, Cunningham KA. Influence of Ovarian Hormones and  
11 Estrous Cycle on the Behavioral Response to Cocaine in Female Rats. *J Pharmacol Exp*  
12 *Ther*. 2000 Jun 1;293(3):879–86.  
13  
14  
15 45. Hu M, Becker JB. Effects of Sex and Estrogen on Behavioral Sensitization to Cocaine in  
16 Rats. *J Neurosci*. 2003 Jan 15;23(2):693–9.  
17  
18  
19  
20  
21  
22  
23  
24  
25  
26  
27  
28  
29  
30  
31  
32  
33  
34  
35  
36  
37  
38  
39  
40  
41  
42  
43  
44  
45  
46  
47  
48  
49  
50  
51  
52  
53  
54  
55  
56  
57  
58  
59  
60

Confidential

1  
2  
3  
4  
5  
6  
7  
8  
9  
10  
11  
12  
13  
14  
15  
16  
17  
18  
19  
20  
21  
22  
23  
24  
25  
26  
27  
28  
29  
30  
31  
32  
33  
34  
35  
36  
37  
38  
39  
40  
41  
42  
43  
44  
45  
46  
47

**Table 1.** International Classification of Disease (ICD-10) codes for deaths related to toxic (starting with T) and chronic (starting with F) use of cocaine, opioid, and amphetamines. These totals are not mutually exclusive; any death with codes for multiple drugs is counted here for each of those drugs. All deaths with a T code (first row for each drug) were included in the main analyses, and any deaths with an F code for only one of the drugs were used as a comparator.

| <b>Code</b>               | <b>Description</b>                                       | <b>Number of deaths included in study<br/>(number with code as the primary cause)</b> |
|---------------------------|----------------------------------------------------------|---------------------------------------------------------------------------------------|
| <b>Cocaine</b>            |                                                          |                                                                                       |
| Any T405                  | Poisoning by or adverse effect of cocaine.               | 1382 (0)                                                                              |
| Any F140-F149             | Cocaine related mental and behavioral disorders.         | 1195 (42)                                                                             |
| Both T and F code present |                                                          | 438                                                                                   |
| Only F140-F149            |                                                          | 757                                                                                   |
| <b>Opioids</b>            |                                                          |                                                                                       |
| Any T400-T404 or T406     | Poisoning by or adverse effect of opioids.               | 2422 (0)                                                                              |
| Any F110-F119             | Opioid related mental and behavioral disorders.          | 870 (12)                                                                              |
| Both T and F code present |                                                          | 498                                                                                   |
| Only F110-F119            |                                                          | 372                                                                                   |
| <b>Amphetamines</b>       |                                                          |                                                                                       |
| Any T436                  | Poisoning by or adverse effect of psychostimulants.      | 390 (0)                                                                               |
| Any F150-F159             | Psychostimulant related mental and behavioral disorders. | 262 (3)                                                                               |
| Both T and F code present |                                                          | 116                                                                                   |
| Only F150-F159            |                                                          | 146                                                                                   |

**Table 2.** Summary information for all deaths included in the main analyses, with cocaine, opioid, or amphetamine toxicity (T code) present in the vital statistics record.

|                                                                         | <b>Cocaine only</b> | <b>Opioid only</b> | <b>Amphetamine only</b> | <b>More than one drug</b> |
|-------------------------------------------------------------------------|---------------------|--------------------|-------------------------|---------------------------|
| <b>Median Age</b>                                                       | 42                  | 44                 | 38                      | 39                        |
| Number of deaths (percentage)                                           |                     |                    |                         |                           |
| <b>Sex</b>                                                              |                     |                    |                         |                           |
| Female                                                                  | 107 (21.9%)         | 436 (30.6%)        | 28 (25.2%)              | 266 (25.8%)               |
| Male                                                                    | 381 (78.1%)         | 990 (69.4%)        | 83 (74.8%)              | 767 (74.2%)               |
| <b>Region</b>                                                           |                     |                    |                         |                           |
| Greater Vancouver                                                       | 271 (55.5%)         | 669 (46.9%)        | 80 (72.1%)              | 628 (60.8%)               |
| Rest of BC                                                              | 217 (44.5%)         | 757 (53.1%)        | 31 (27.9%)              | 405 (39.2%)               |
| <b>Regional percentile of maximum temperature (°C) on date of death</b> |                     |                    |                         |                           |
| < 50%                                                                   | 232 (47.5%)         | 714 (50.1%)        | 54 (48.6%)              | 495 (47.9%)               |
| 50-75%                                                                  | 116 (23.8%)         | 332 (23.3%)        | 27 (24.3%)              | 233 (22.6%)               |
| 75-90%                                                                  | 80 (16.4%)          | 216 (15.1%)        | 19 (17.1%)              | 179 (17.3%)               |
| >= 90%                                                                  | 60 (12.3%)          | 164 (11.5%)        | 11 (9.9%)               | 126 (12.2%)               |
| <b>Total</b>                                                            | 488                 | 1426               | 111                     | 1033                      |

1  
2  
3  
4  
5  
6  
7  
8  
9  
10  
11  
12  
13  
14  
15  
16  
17  
18  
19  
20  
21  
22  
23  
24  
25  
26  
27  
28  
29  
30  
31  
32  
33  
34  
35  
36  
37  
38  
39  
40  
41  
42  
43  
44  
45  
46  
47  
48  
49  
50  
51  
52  
53  
54  
55  
56  
57  
58  
59  
60

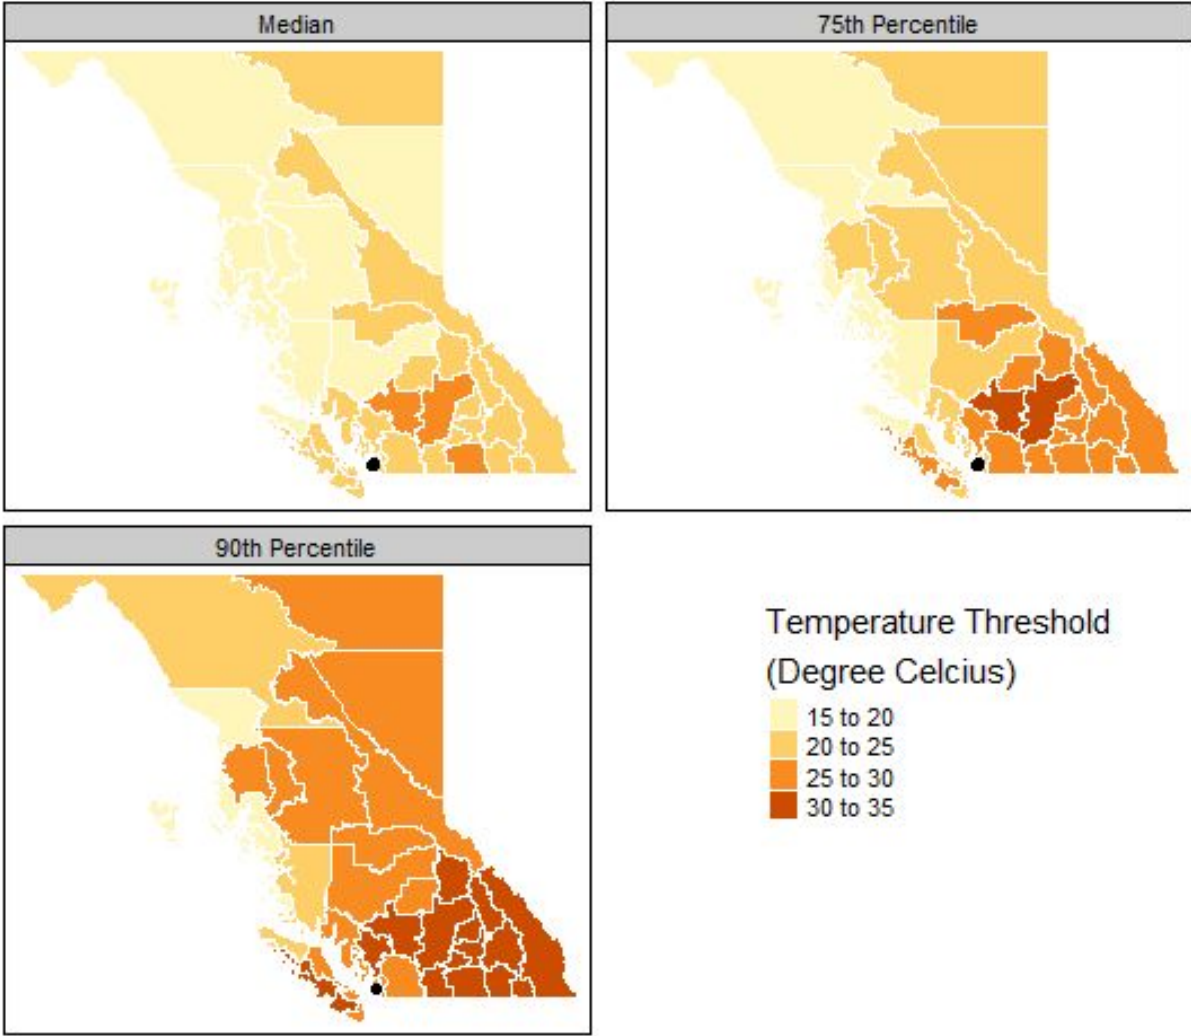

**Figure 1.** Thresholds corresponding to the median, 75<sup>th</sup> percentile and 90<sup>th</sup> percentile for the 32 temperature zones in British Columbia, Canada. The greater Vancouver area is indicated by the black dot.

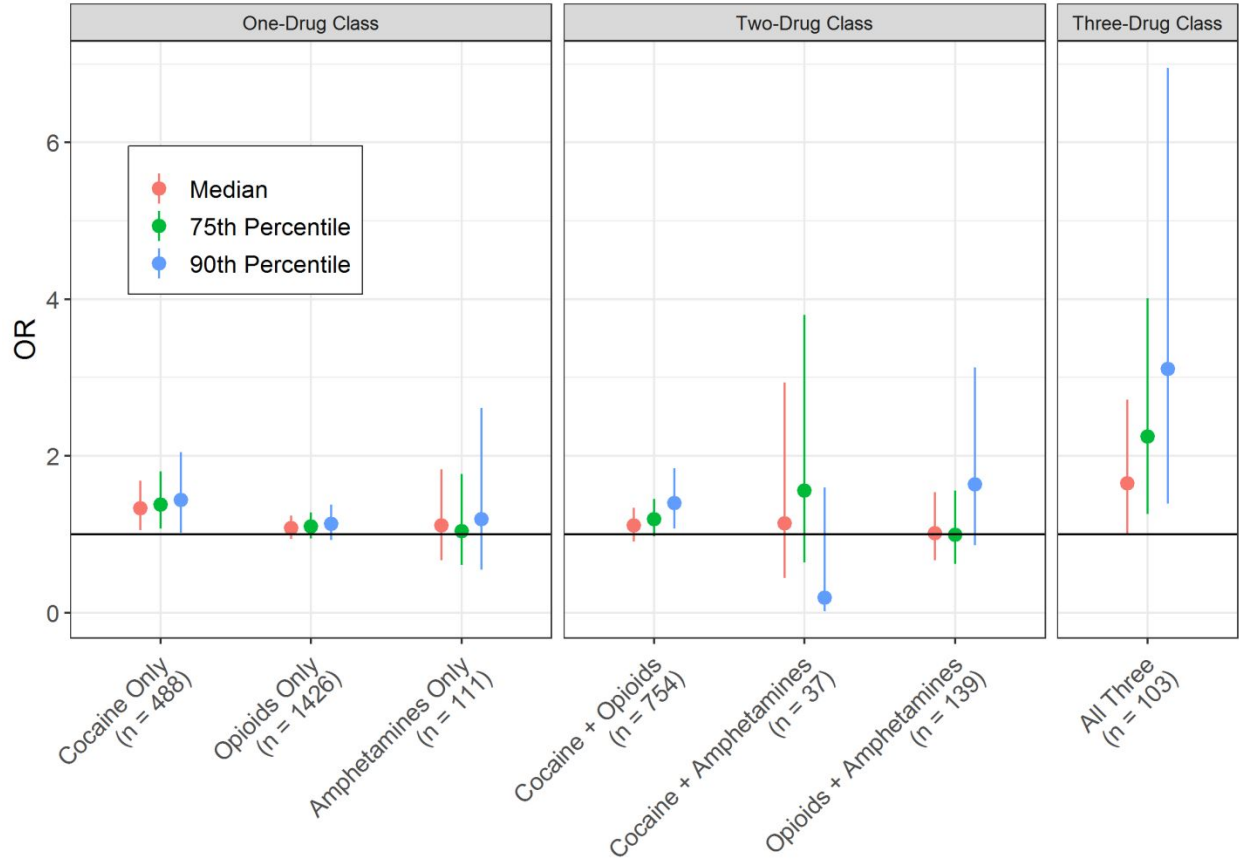

**Figure 2.** Odds ratios (ORs) and 95% confidence intervals for mortality associated with acute cocaine, opioid, and amphetamine toxicity (T code) on May-September days with maximum temperatures over the zonal median, 75<sup>th</sup>, and 90<sup>th</sup> percentiles.

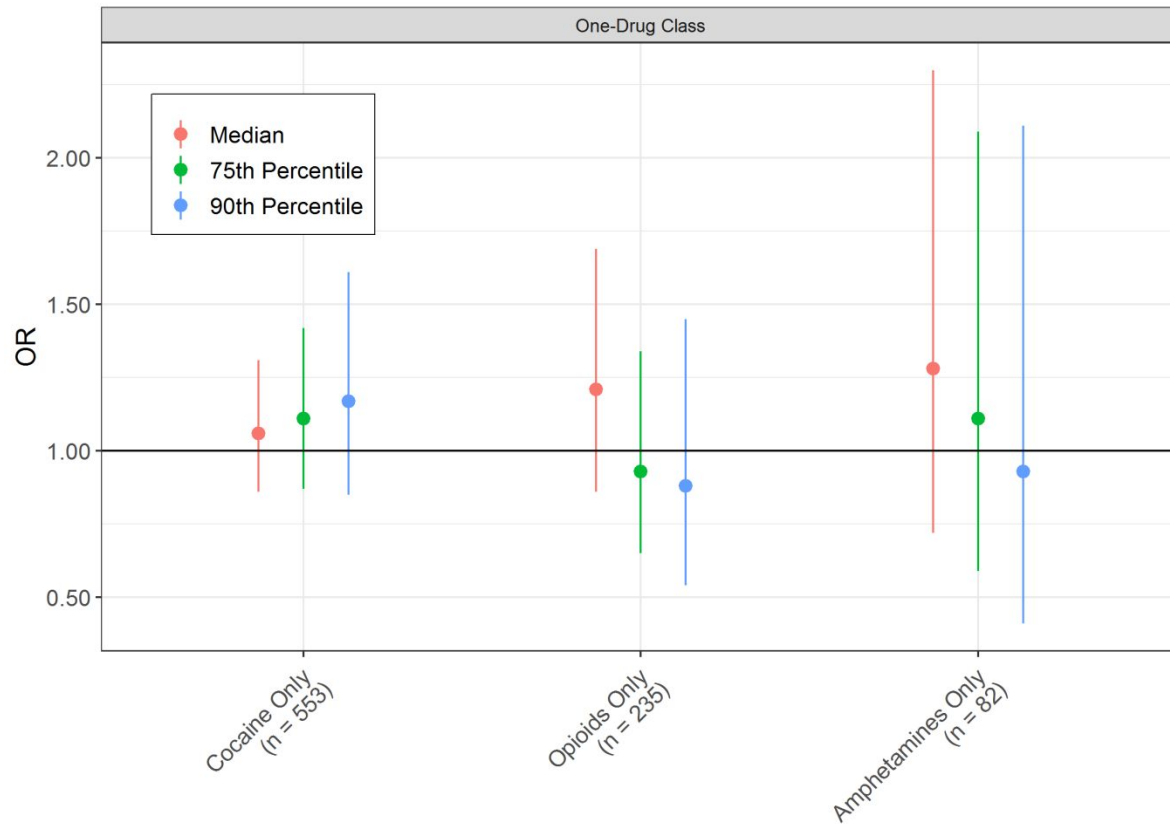

**Figure 3.** Odds ratios (ORs) and 95% confidence intervals for mortality associated with chronic cocaine, opioid, or amphetamine use (F code) without evidence of acute toxicity (T code) on May-September days with maximum temperatures over the zonal median, 75<sup>th</sup>, and 90<sup>th</sup> percentiles. Analyses include deaths with an F code for a single drug, and no T codes for any of the drugs.



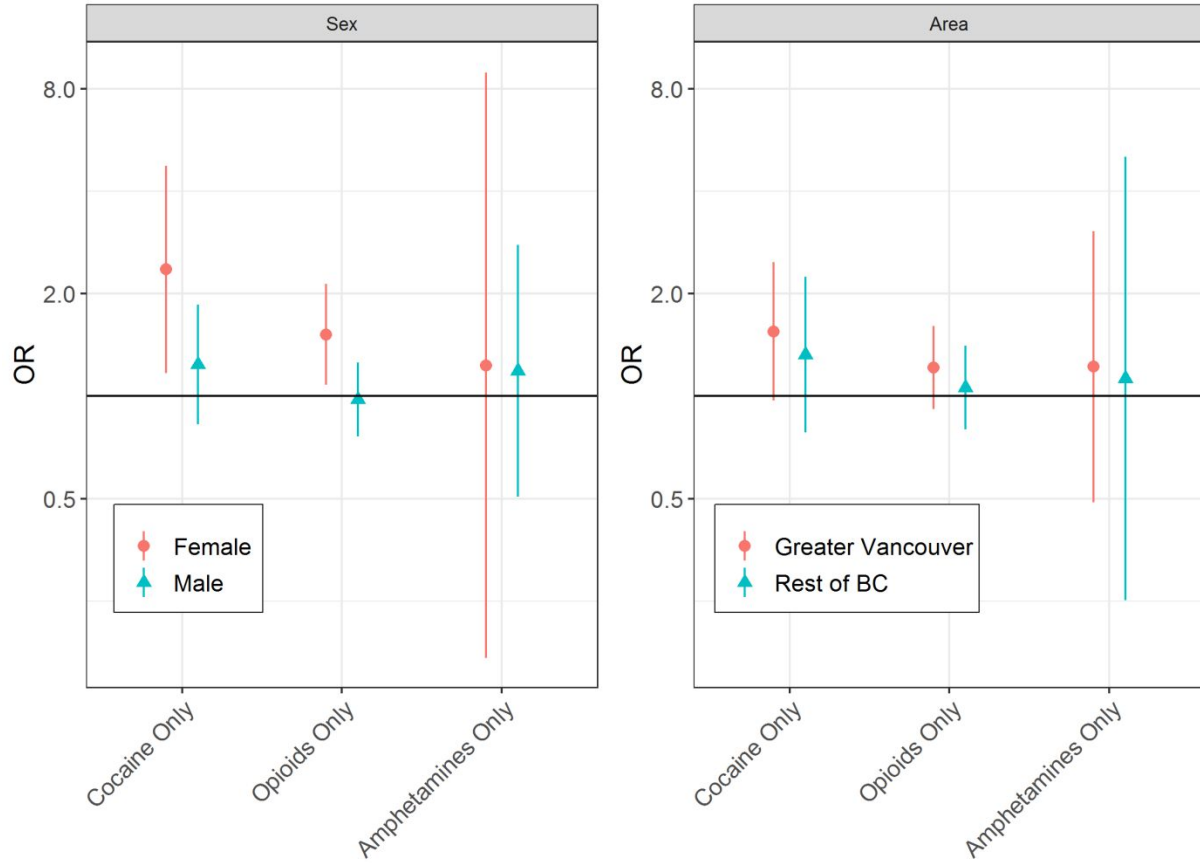

**Figure 4.** Odds ratios (ORs) and 95% confidence intervals for mortality associated with acute cocaine, opioid, and amphetamine toxicity (T code) on days with maximum temperatures over the zonal 90<sup>th</sup> percentile, stratified by sex (left) and residential location (right).

STROBE Statement—Checklist of items that should be included in reports of *case-control studies*  
(or *case-crossover*)

|                           | Item No | Recommendation                                                                                                                                                                                    | Line Nos           |
|---------------------------|---------|---------------------------------------------------------------------------------------------------------------------------------------------------------------------------------------------------|--------------------|
| <b>Title and abstract</b> | 1       | (a) Indicate the study's design with a commonly used term in the title or the abstract                                                                                                            | 1-3                |
|                           |         | (b) Provide in the abstract an informative and balanced summary of what was done and what was found                                                                                               | 29-40              |
| <b>Introduction</b>       |         |                                                                                                                                                                                                   |                    |
| Background/rationale      | 2       | Explain the scientific background and rationale for the investigation being reported                                                                                                              | 46-70              |
| Objectives                | 3       | State specific objectives, including any prespecified hypotheses                                                                                                                                  | 68-70              |
| <b>Methods</b>            |         |                                                                                                                                                                                                   |                    |
| Study design              | 4       | Present key elements of study design early in the paper                                                                                                                                           | 68-70              |
| Setting                   | 5       | Describe the setting, locations, and relevant dates, including periods of recruitment, exposure, follow-up, and data collection                                                                   | 73-80              |
| Participants              | 6       | (a) Give the eligibility criteria, and the sources and methods of case ascertainment and control selection. Give the rationale for the choice of cases and controls                               | 82-95<br>108-123   |
|                           |         | (b) For matched studies, give matching criteria and the number of controls per case                                                                                                               | 108-123            |
| Variables                 | 7       | Clearly define all outcomes, exposures, predictors, potential confounders, and effect modifiers. Give diagnostic criteria, if applicable                                                          | 81-106             |
| Data sources/measurement  | 8*      | For each variable of interest, give sources of data and details of methods of assessment (measurement). Describe comparability of assessment methods if there is more than one group              | 81-106             |
| Bias                      | 9       | Describe any efforts to address potential sources of bias                                                                                                                                         | 125-136            |
| Study size                | 10      | Explain how the study size was arrived at                                                                                                                                                         | 82-95              |
|                           |         |                                                                                                                                                                                                   | 138-147            |
| Quantitative variables    | 11      | Explain how quantitative variables were handled in the analyses. If applicable, describe which groupings were chosen and why                                                                      | 98-106             |
| Statistical methods       | 12      | (a) Describe all statistical methods, including those used to control for confounding                                                                                                             | 125-137            |
|                           |         | (b) Describe any methods used to examine subgroups and interactions                                                                                                                               | 125-137            |
|                           |         | (c) Explain how missing data were addressed                                                                                                                                                       | N/A                |
|                           |         | (d) If applicable, explain how matching of cases and controls was addressed                                                                                                                       | 108-116            |
|                           |         | (e) Describe any sensitivity analyses                                                                                                                                                             | N/A                |
| <b>Results</b>            |         |                                                                                                                                                                                                   |                    |
| Participants              | 13*     | (a) Report numbers of individuals at each stage of study—eg numbers potentially eligible, examined for eligibility, confirmed eligible, included in the study, completing follow-up, and analysed | 139-148<br>Table 1 |
|                           |         | (b) Give reasons for non-participation at each stage                                                                                                                                              | N/A                |

|                          |     |                                                                                                                                                                                                              |                       |
|--------------------------|-----|--------------------------------------------------------------------------------------------------------------------------------------------------------------------------------------------------------------|-----------------------|
|                          |     | (c) Consider use of a flow diagram                                                                                                                                                                           | N/A                   |
| Descriptive data         | 14* | (a) Give characteristics of study participants (eg demographic, clinical, social) and information on exposures and potential confounders                                                                     | Table 2               |
|                          |     | (b) Indicate number of participants with missing data for each variable of interest                                                                                                                          | N/A                   |
| Outcome data             | 15* | Report numbers in each exposure category, or summary measures of exposure                                                                                                                                    | Table 2               |
| Main results             | 16  | (a) Give unadjusted estimates and, if applicable, confounder-adjusted estimates and their precision (eg, 95% confidence interval). Make clear which confounders were adjusted for and why they were included | 145-159<br>Figure 2   |
|                          |     | (b) Report category boundaries when continuous variables were categorized                                                                                                                                    | Figure 1              |
|                          |     | (c) If relevant, consider translating estimates of relative risk into absolute risk for a meaningful time period                                                                                             | N/A                   |
| Other analyses           | 17  | Report other analyses done—eg analyses of subgroups and interactions, and sensitivity analyses                                                                                                               | 162-175<br>Figure 3-4 |
| <b>Discussion</b>        |     |                                                                                                                                                                                                              |                       |
| Key results              | 18  | Summarise key results with reference to study objectives                                                                                                                                                     | 177-181               |
| Limitations              | 19  | Discuss limitations of the study, taking into account sources of potential bias or imprecision. Discuss both direction and magnitude of any potential bias                                                   | 224-235               |
| Interpretation           | 20  | Give a cautious overall interpretation of results considering objectives, limitations, multiplicity of analyses, results from similar studies, and other relevant evidence                                   | 194-214               |
| Generalisability         | 21  | Discuss the generalisability (external validity) of the study results                                                                                                                                        | 182-193               |
| <b>Other information</b> |     |                                                                                                                                                                                                              |                       |
| Funding                  | 22  | Give the source of funding and the role of the funders for the present study and, if applicable, for the original study on which the present article is based                                                | N/A                   |

\*Give information separately for cases and controls.

**Note:** An Explanation and Elaboration article discusses each checklist item and gives methodological background and published examples of transparent reporting. The STROBE checklist is best used in conjunction with this article (freely available on the Web sites of PLoS Medicine at <http://www.plosmedicine.org/>, Annals of Internal Medicine at <http://www.annals.org/>, and Epidemiology at <http://www.epidem.com/>). Information on the STROBE Initiative is available at <http://www.strobe-statement.org>.
